# Supplementary material for: The Apelin/APJ System in Psychosis and Neuropathy
Source: PubMed Central journal article supplement (PMC7082832; doi:10.3389/fphar.2020.00320), 2020-03-13
Supplement: Image_1.pdf [file Image_1.pdf]

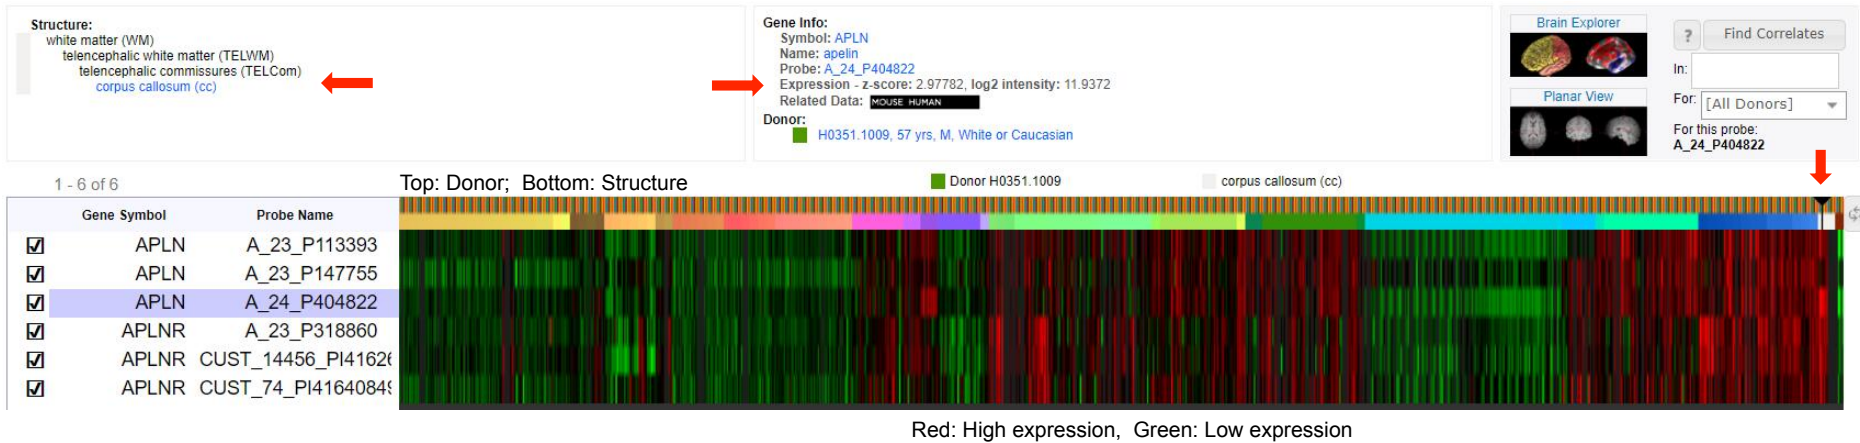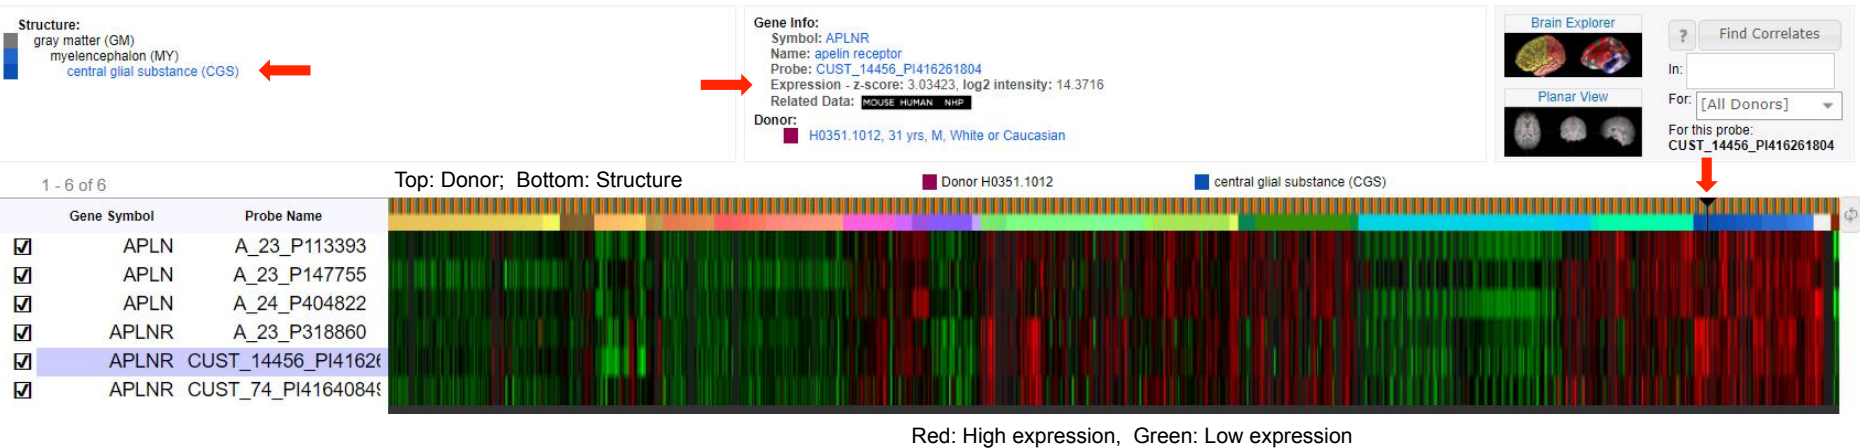

**Supplementary Figure 1.** The *APLN* and *APLNR* gene expression in different regions of the human brain. The data was analyzed and heat map was generated by Allen Human Brain Atlas ([human.brain-map.org](http://human.brain-map.org)), Allen Institute for Brain Science. The number of donors was 3 for *APLN* and 3 for *APLNR*.
